# Supplementary material for: Unveiling the dual-function applications of a magnetically retrievable chemically grafted Schiff base Cu-complex on graphene oxide for catalytic and antibacterial applications
Source: Royal Society of Chemistry journal article supplement (doi:10.1039/d4re00211c), 2024-01-01
Supplement: d4re00211c1.pdf [file d4re00211c1.pdf]

## **Supplementary Information (SI)**

### **Unveiling the dual-function applications of magnetically retrievable chemically grafted Schiff base Cu-complex on graphene oxide for catalytic and biological applications**

Himadri Priya Gogoi<sup>a</sup>, Nilotpal Goswami and Pranjit Barman<sup>a\*</sup>

<sup>a</sup>Department of Chemistry, National Institute of Technology, Silchar-788010, Assam, India

\*Author of Correspondence : Dr. Pranjit Barman, (Contact no: +91-9435374128)

(Email id: [barmanpranjit@yahoo.co.in/pranjit@che.nits.ac.in](mailto:barmanpranjit@yahoo.co.in/pranjit@che.nits.ac.in))

#### **List of Figures:**

**Fig.S1** EDX spectra of CuSB-GO/FO.

**Fig.S2** XPS spectra of (a) GO, (b) FO, (c) CuSB-GO.

**Fig.S3** <sup>1</sup>H-NMR Spectra of compounds listed in **Table 2**.

**Fig.S4** <sup>13</sup>C-NMR Spectra of compounds listed in **Table 2**.

**Fig.S5** FT-IR Spectra of compounds listed in **Table 2**.

**Fig. S6** <sup>1</sup>H-NMR of alkene intermediate (I).

**Fig.S7** Recyclable catalyst (a) XRD; (b-c) SEM.

**Fig.S8** Recyclability of CuSB-GO/FO for the catalytic production of 3-substituted indole up to 4 cycles.

**Table S1** The bactericidal activity of GO, GO-NH, and CuSB-GO/FO.

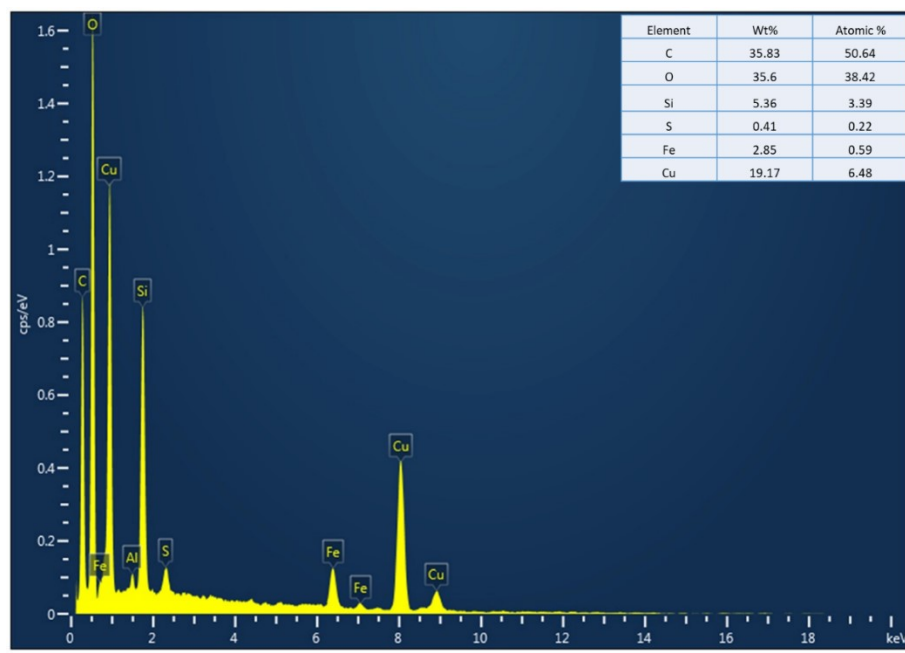

Fig.S1 EDX spectra of CuSB-GO/FO.

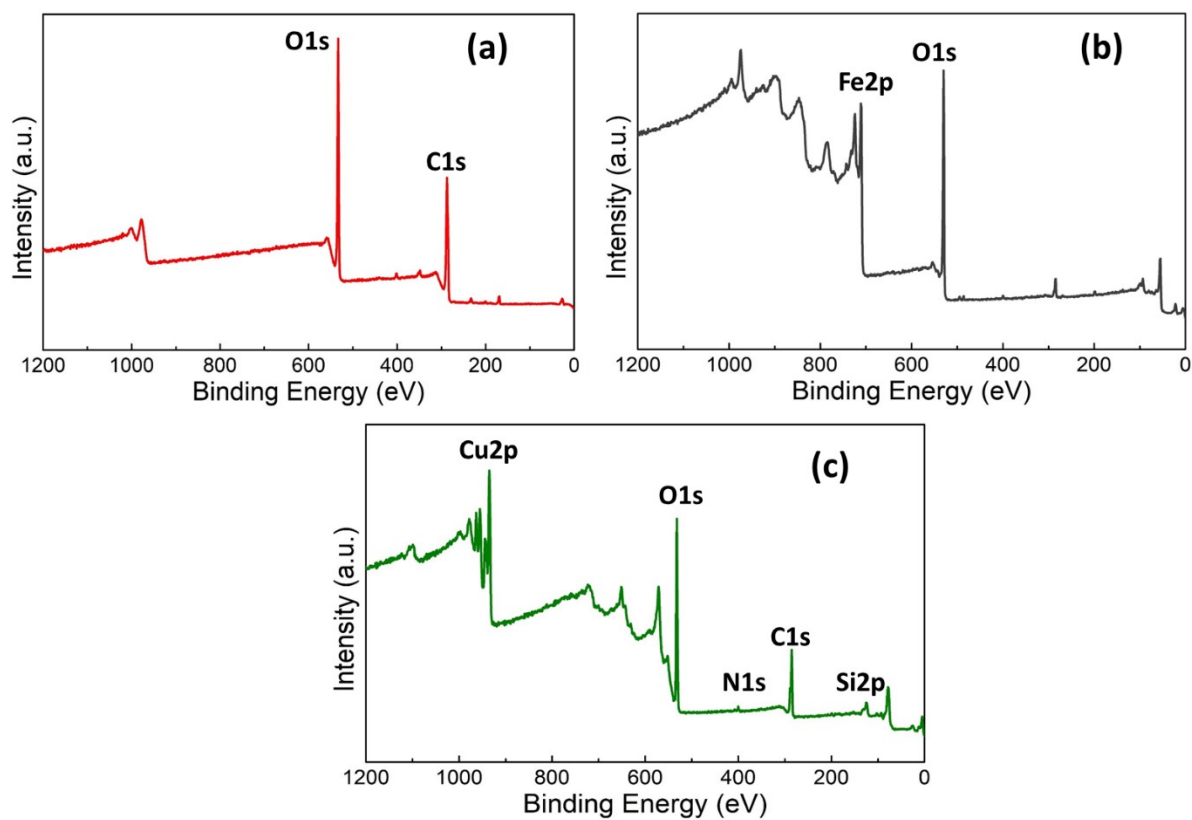

Fig.S2 XPS spectra of (a) GO, (b) FO, (c) CuSB-GO.

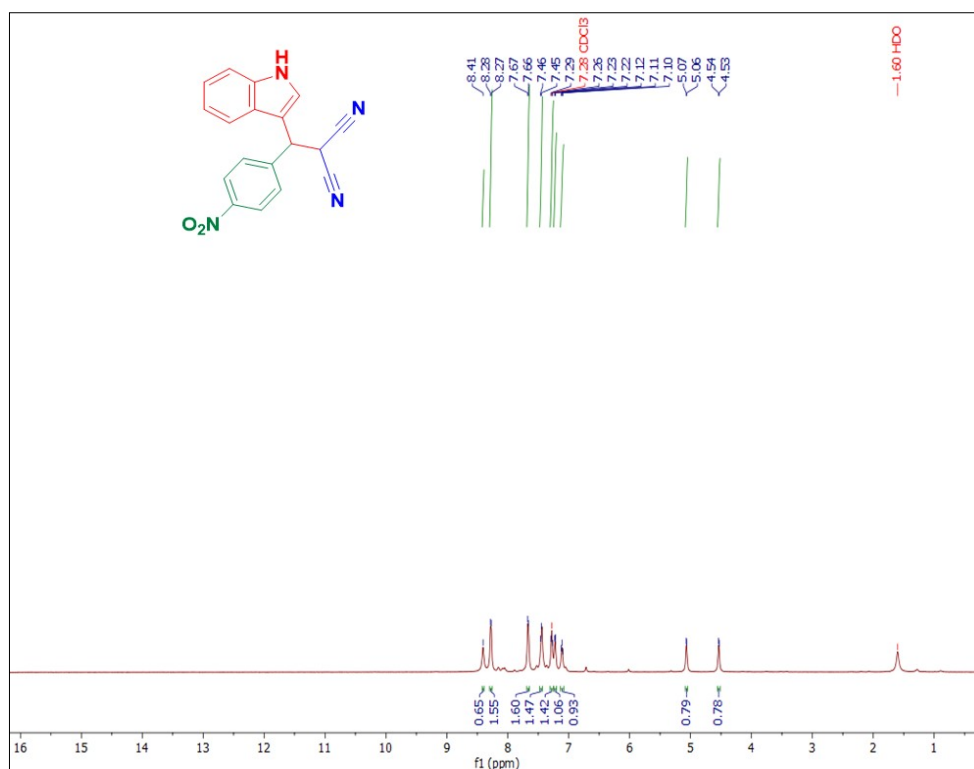

Fig.S3a <sup>1</sup>H-NMR of compound I1.

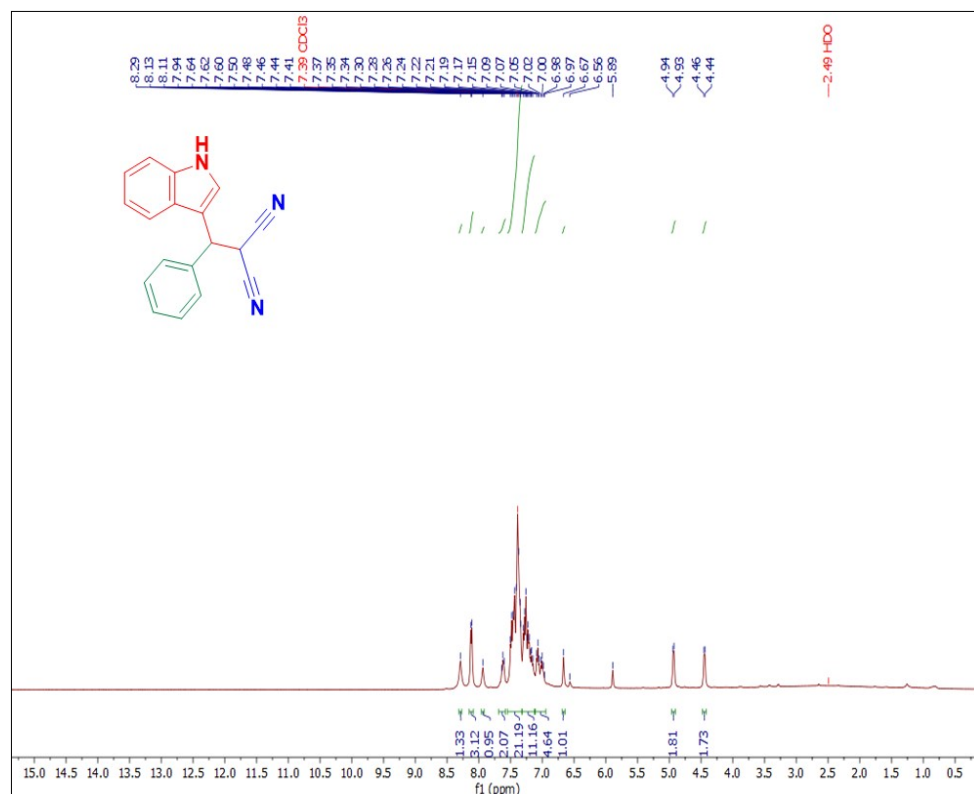

Fig.S3b <sup>1</sup>H-NMR of compound I2.

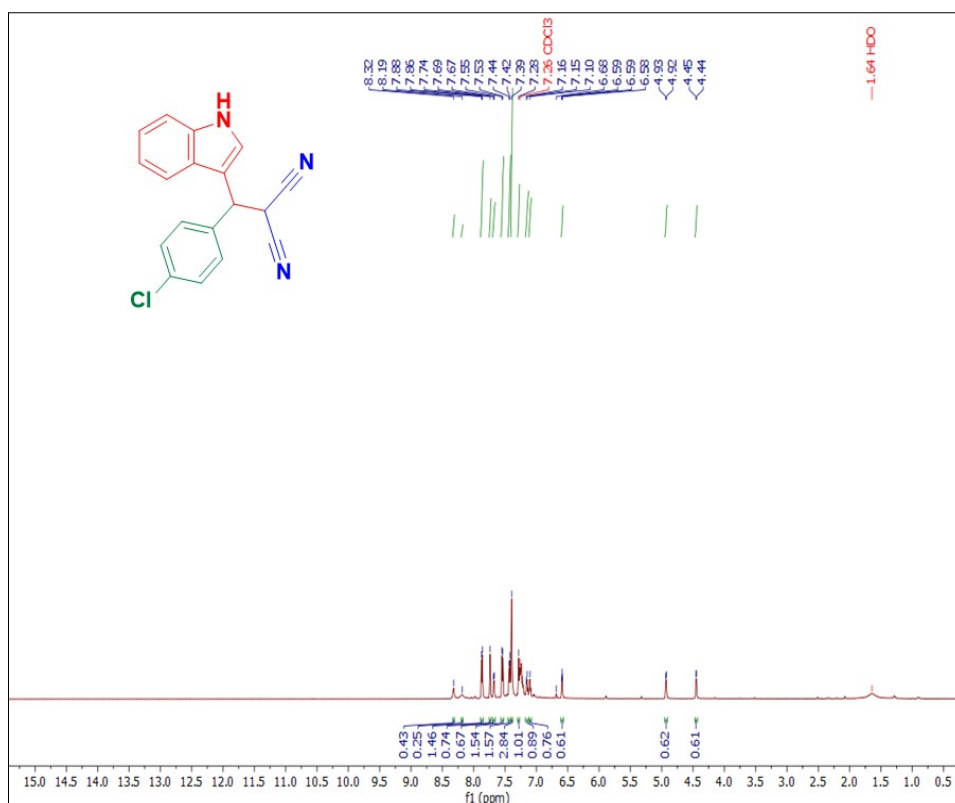

Fig.S3c <sup>1</sup>H-NMR of compound I3.

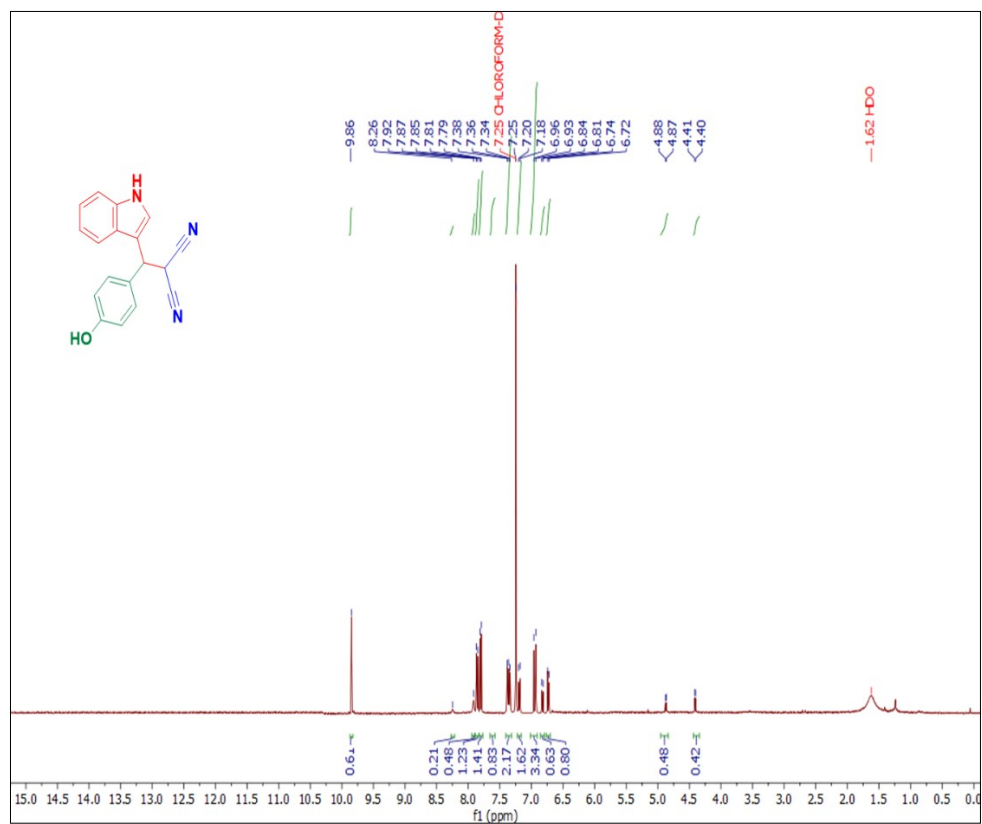

Fig.S3d <sup>1</sup>H-NMR of compound I4.

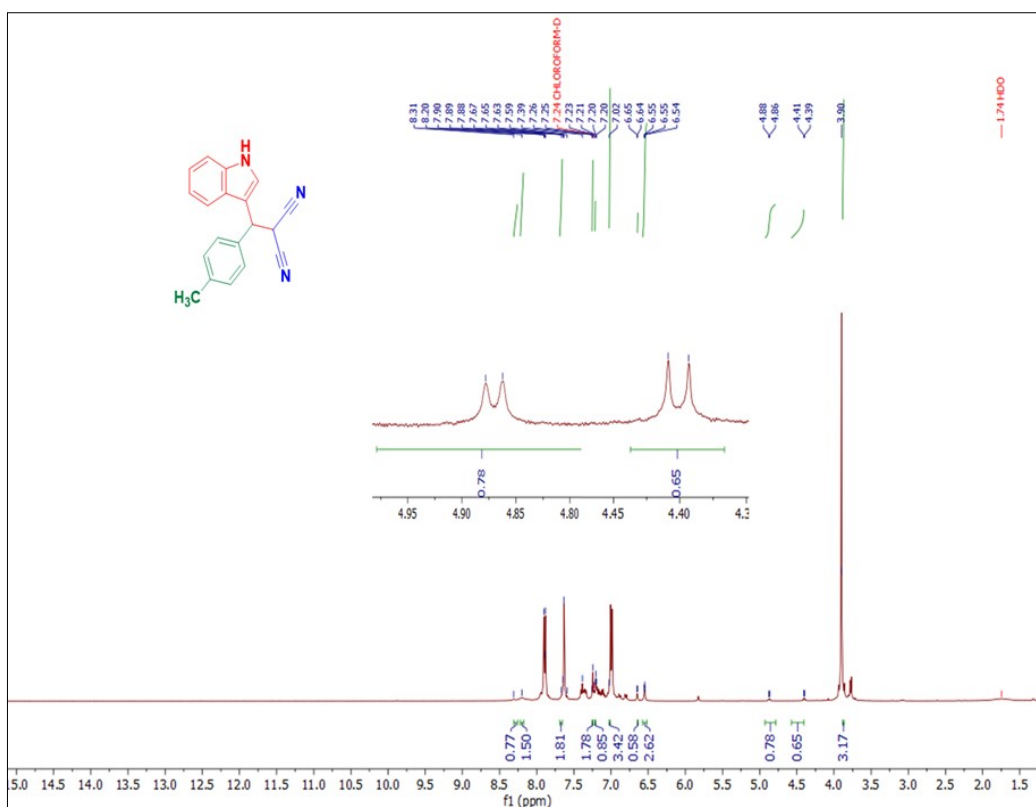

Fig.S3e <sup>1</sup>H-NMR of compound I5.

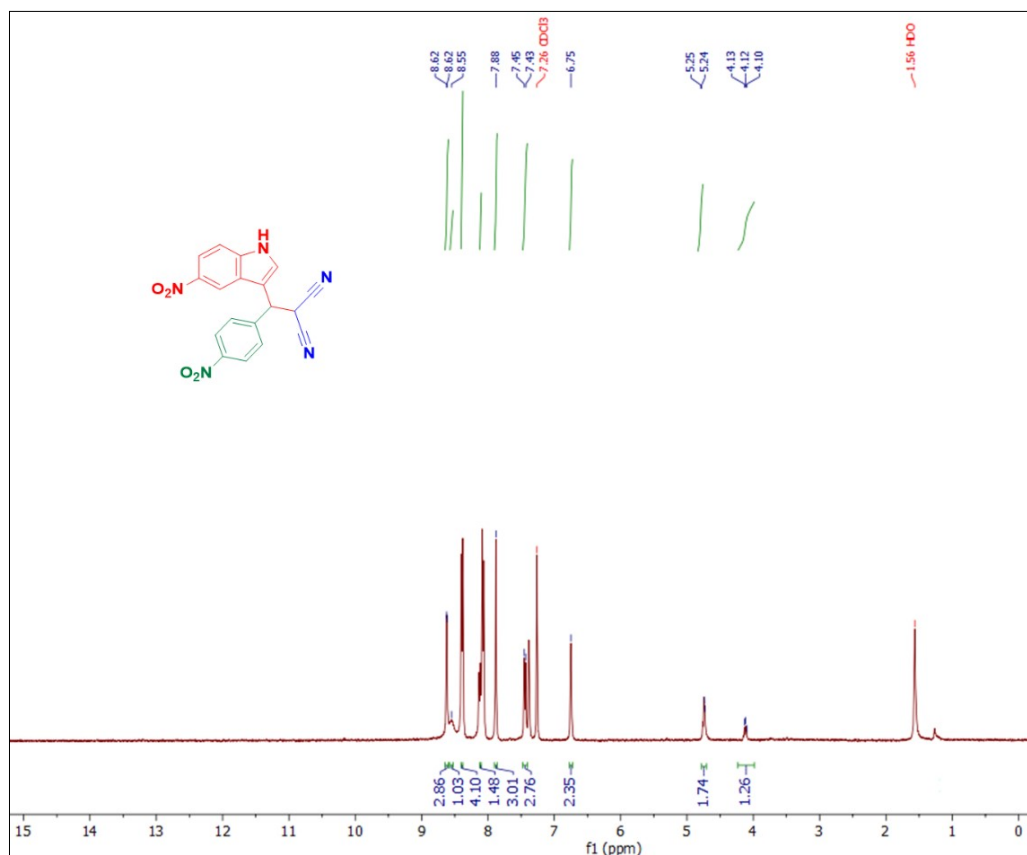

Fig.S3f <sup>1</sup>H-NMR of compound I6.

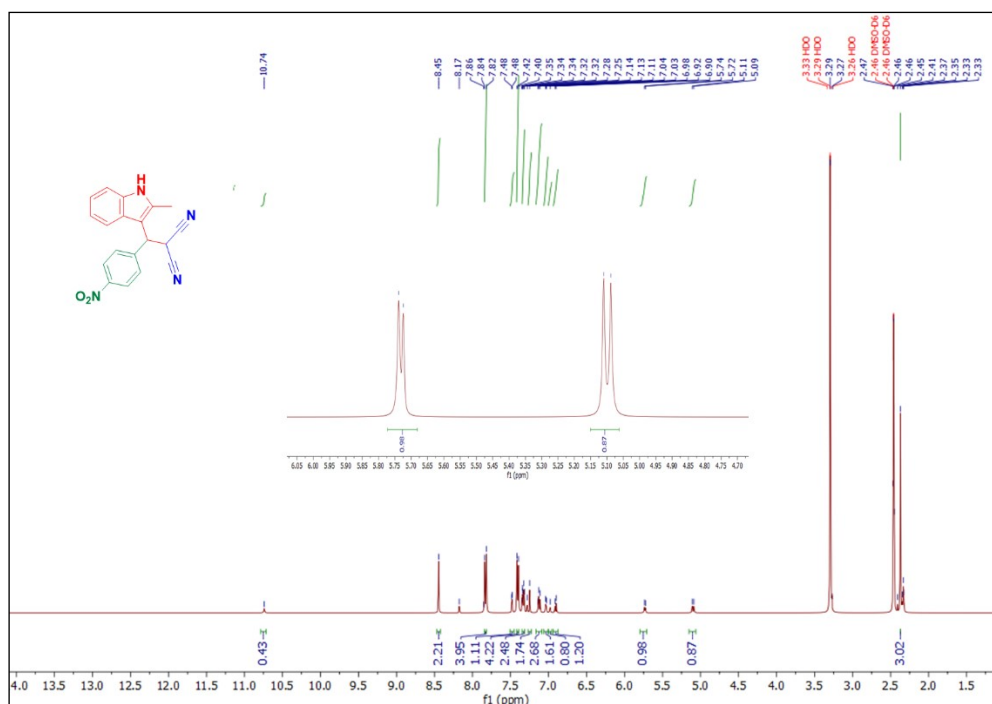

Fig.S3g <sup>1</sup>H-NMR of compound I7.

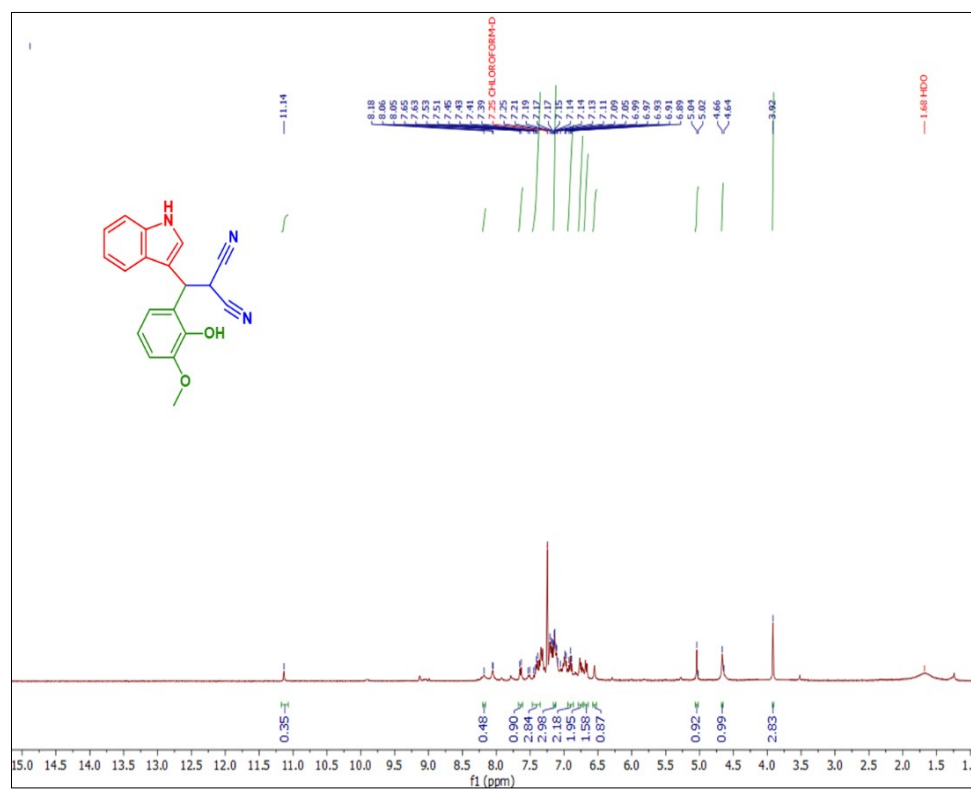

Fig.S3h <sup>1</sup>H-NMR of compound I8.

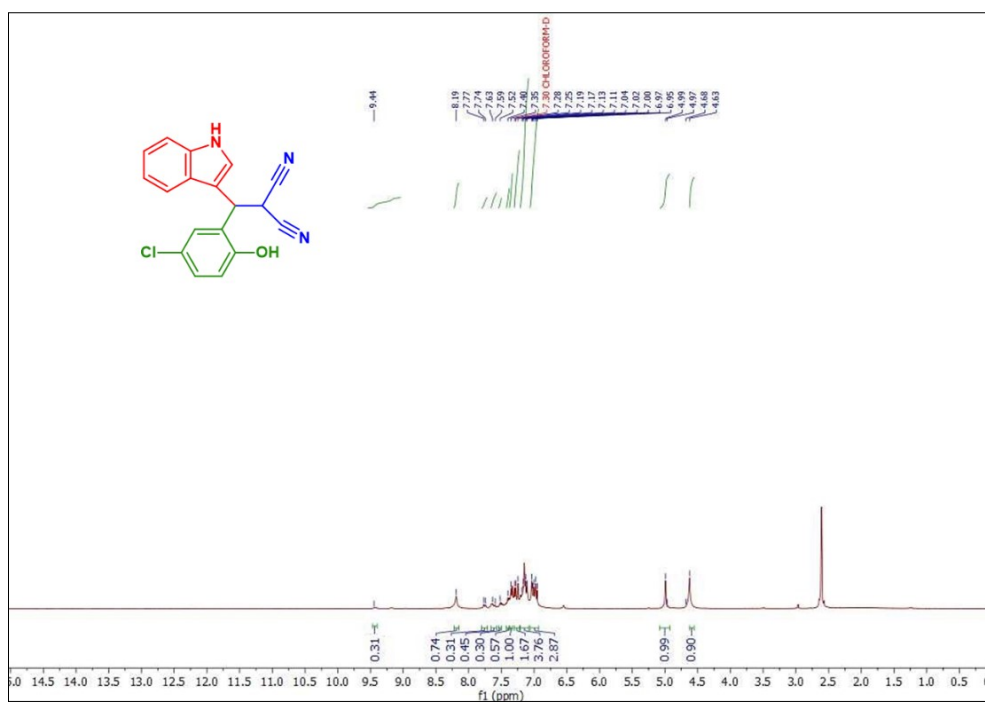

Fig.S3i 1H-NMR of compound I9.

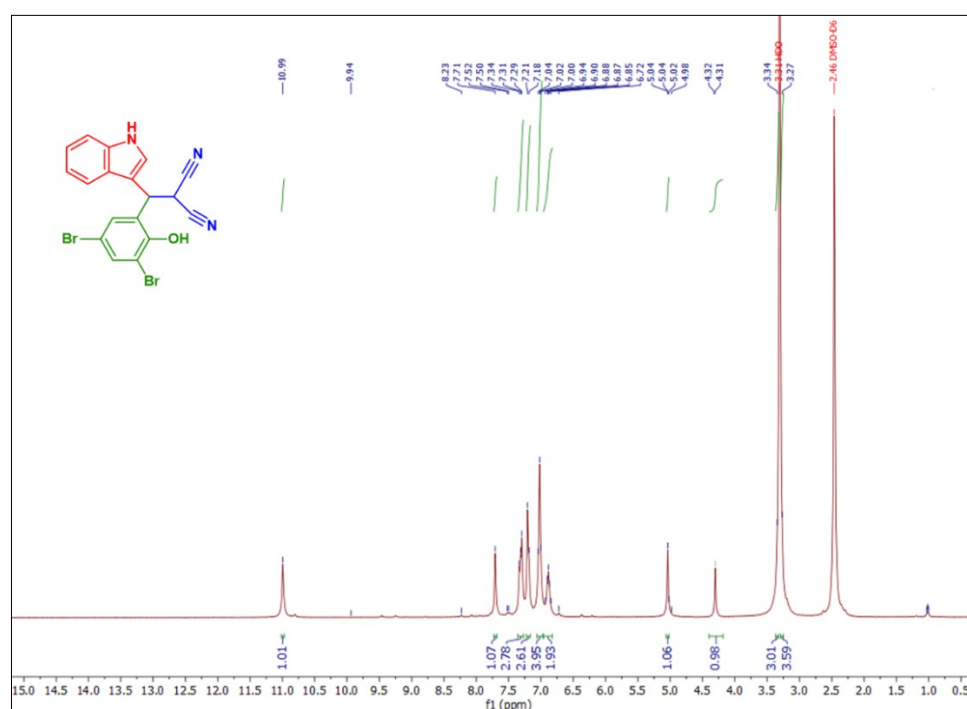

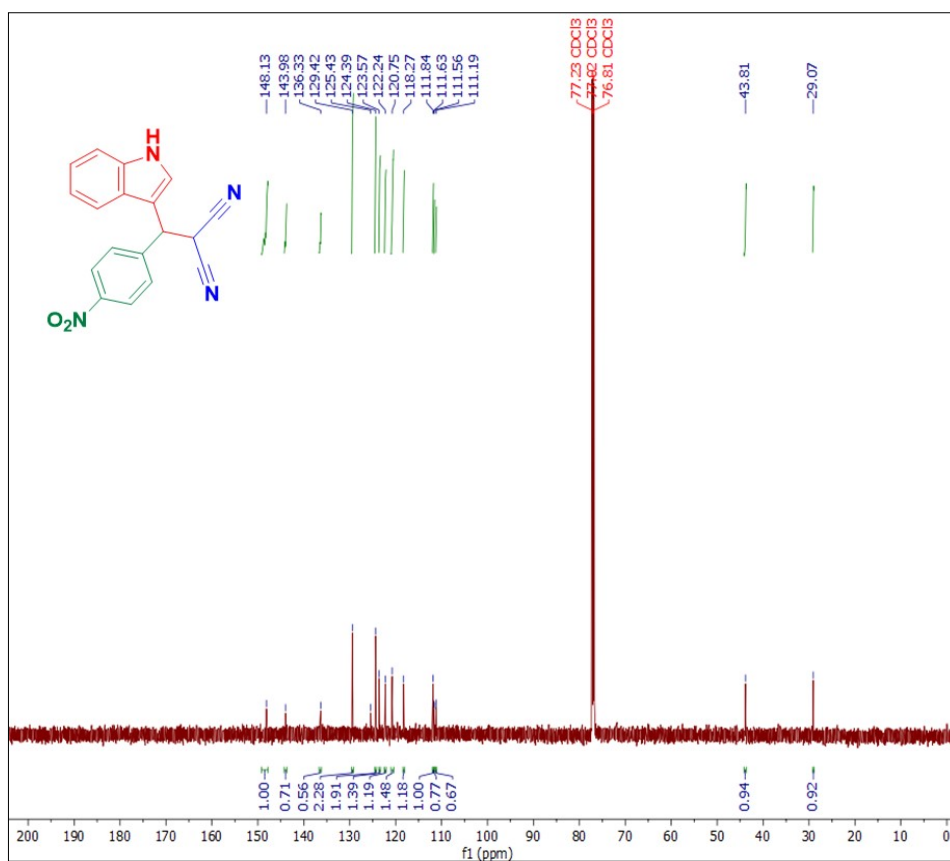

**Fig.S4a** <sup>13</sup>C-NMR of compound I1.

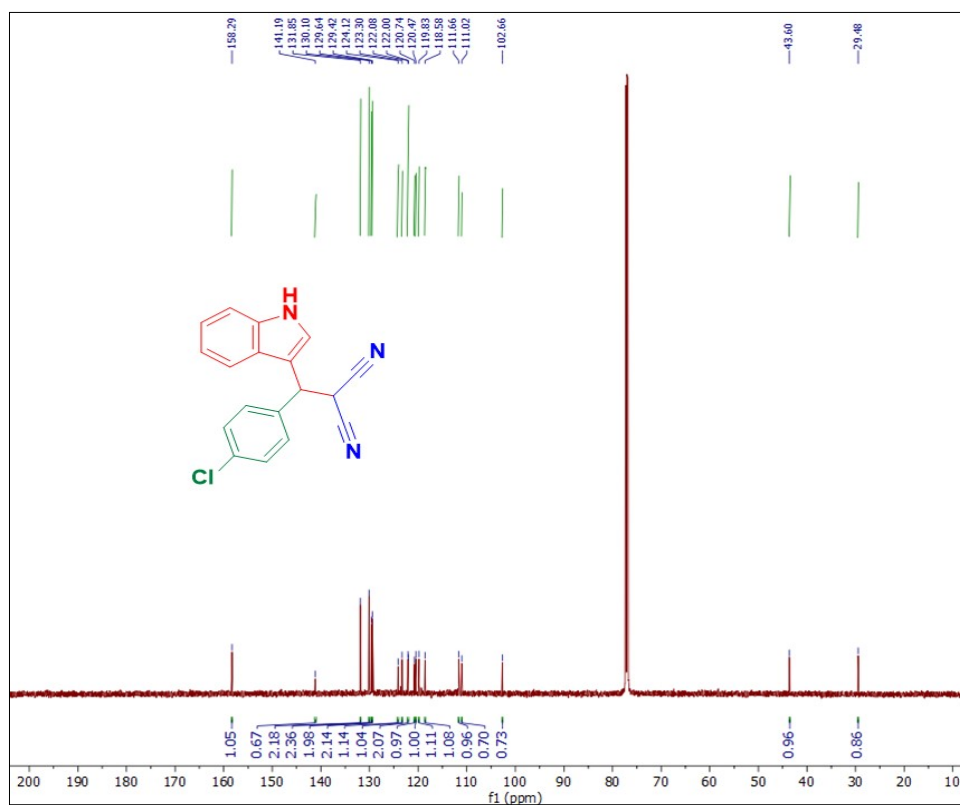

**Fig.S4b** <sup>13</sup>C-NMR of compound I2.



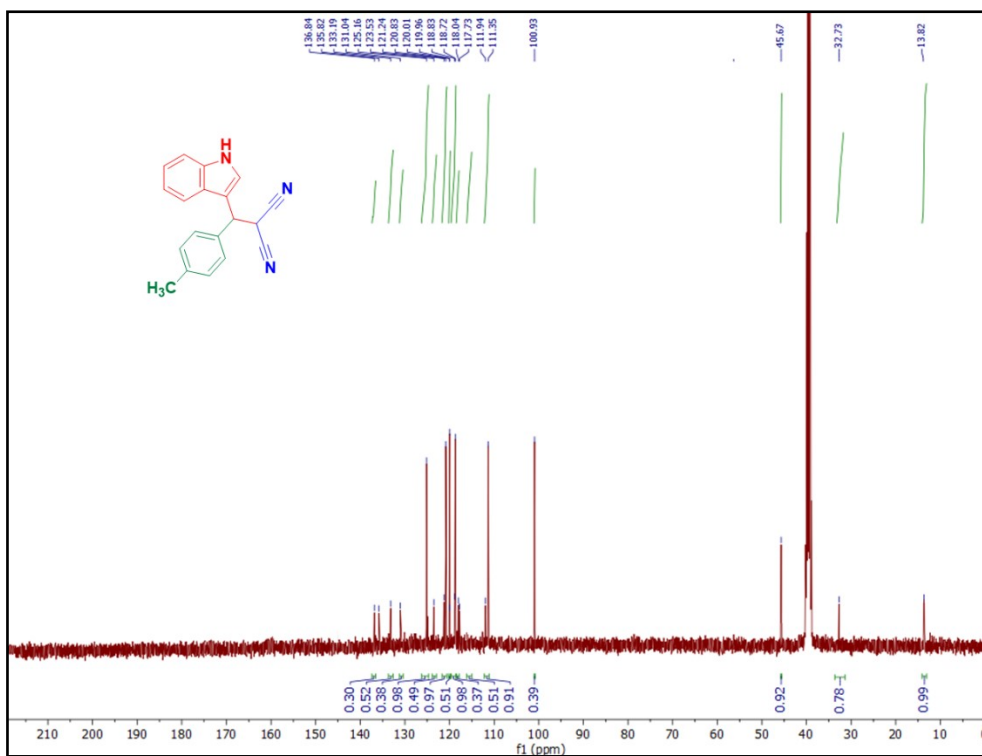

Fig.S4c <sup>13</sup>C-NMR of compound I5.

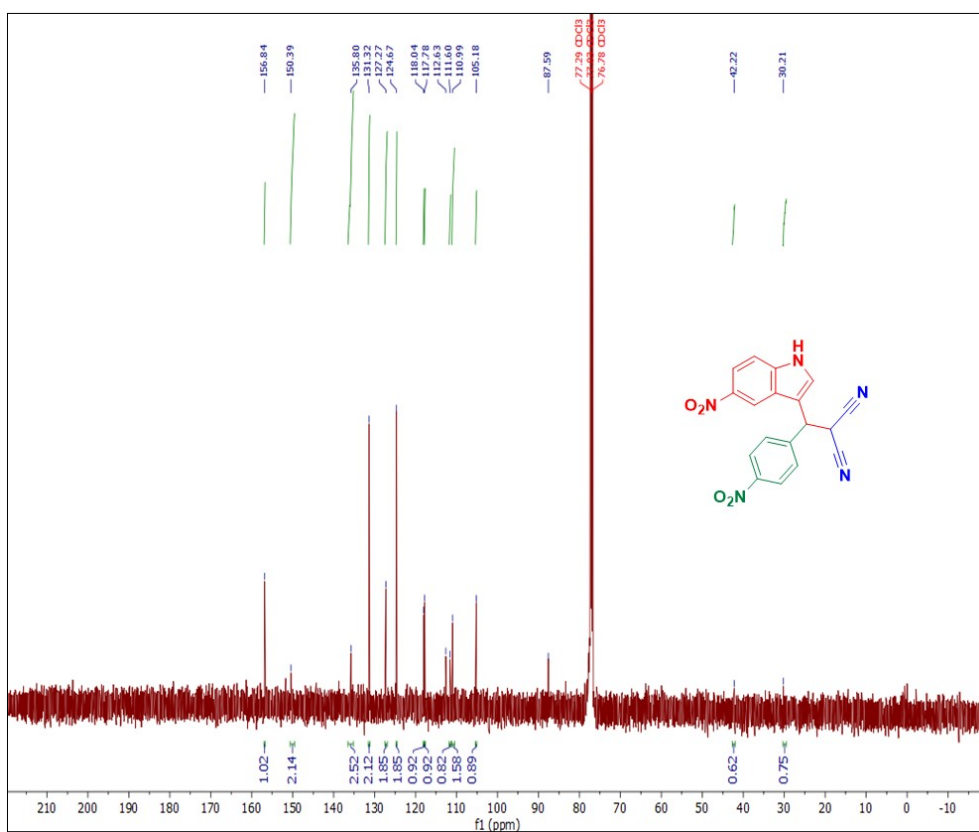

Fig.S4d <sup>13</sup>C-NMR of compound I6.

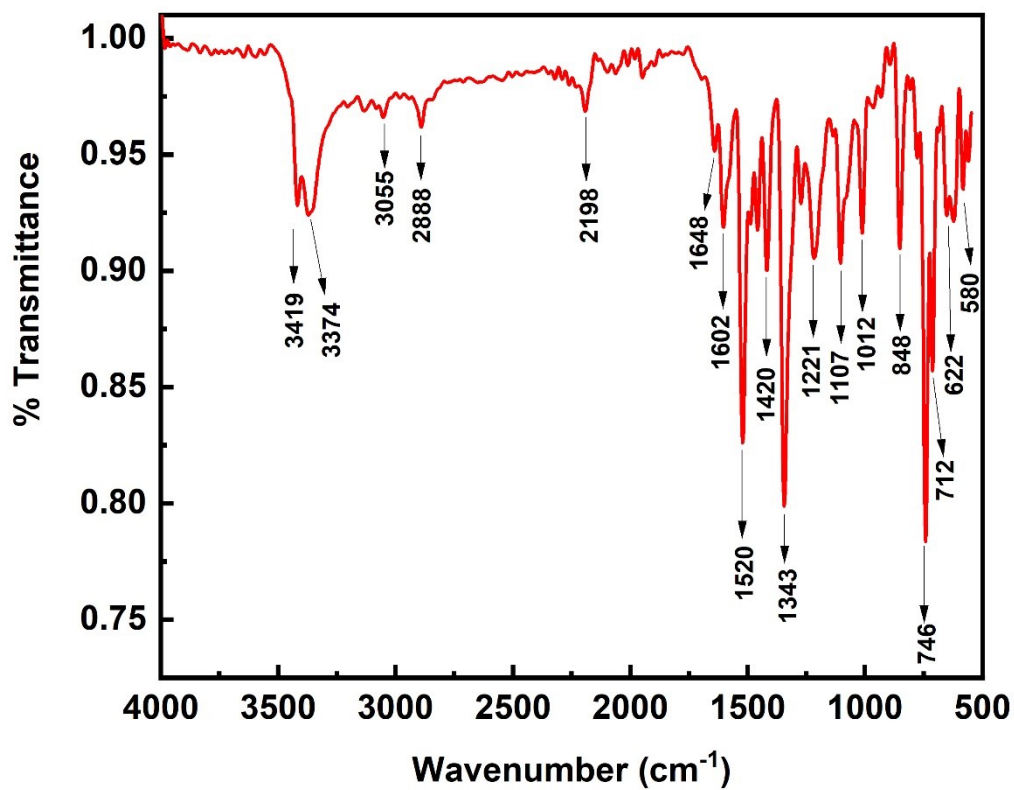

Fig.S5a FT-IR spectra of compounds I1.

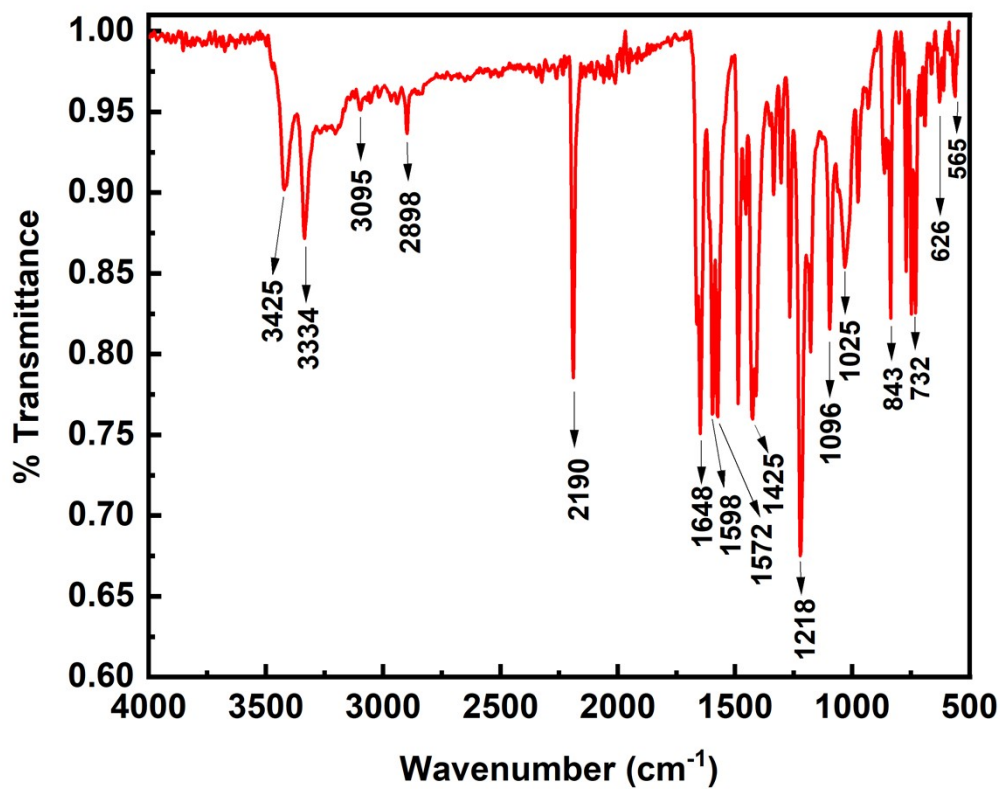

Fig.S5b FT-IR spectra of compounds I2.

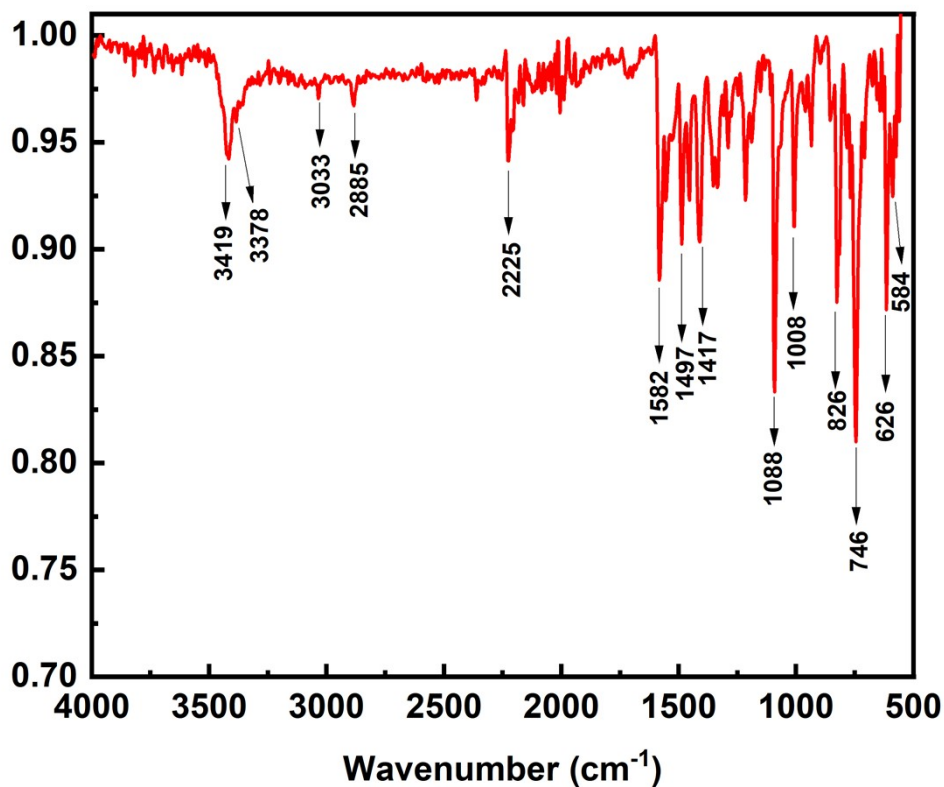

Fig.S5c FT-IR spectra of compounds I3.

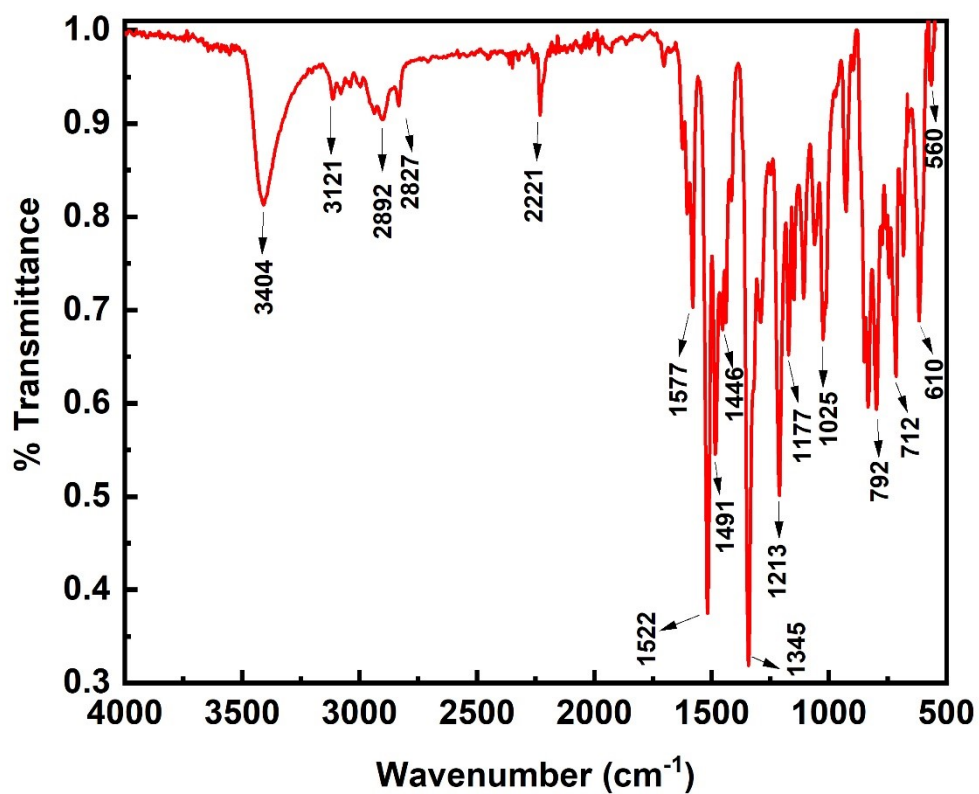

Fig.S5d FT-IR spectra of compounds I4.

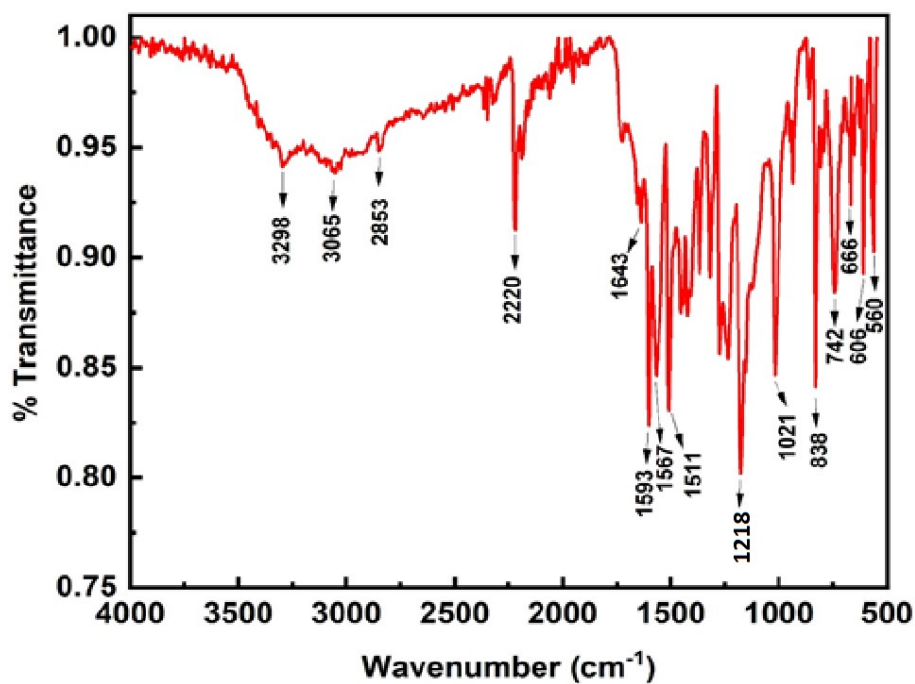

Fig.S5e FT-IR spectra of compounds I5.

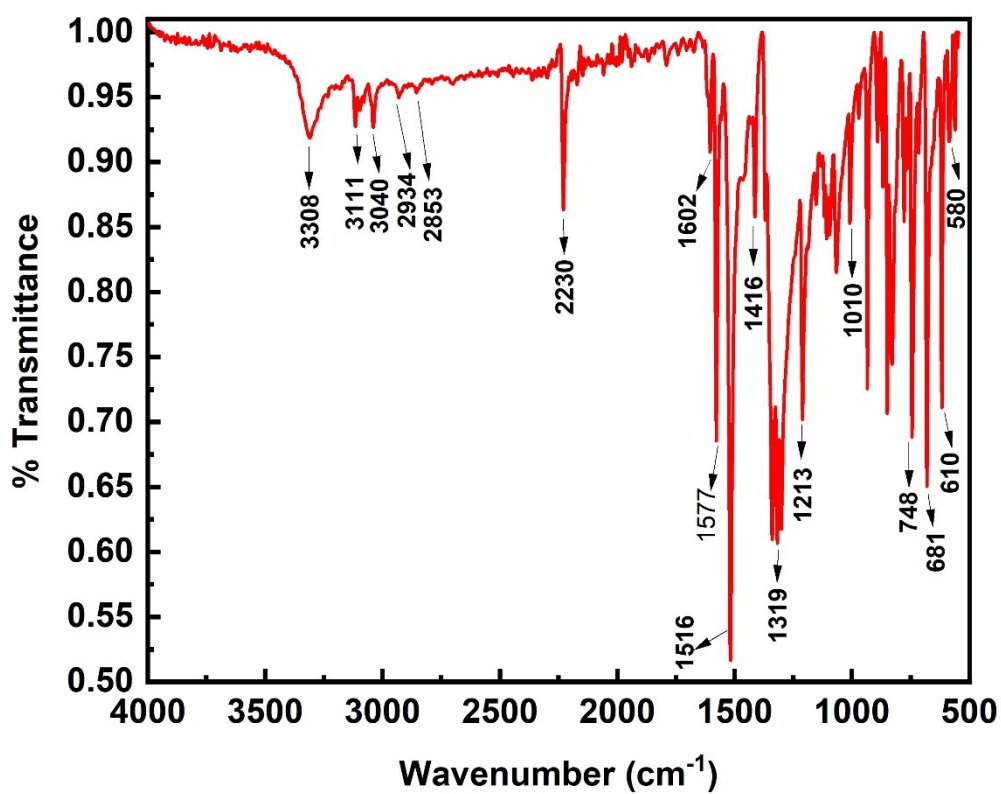

Fig.S5f FT-IR Spectra of compound I6.

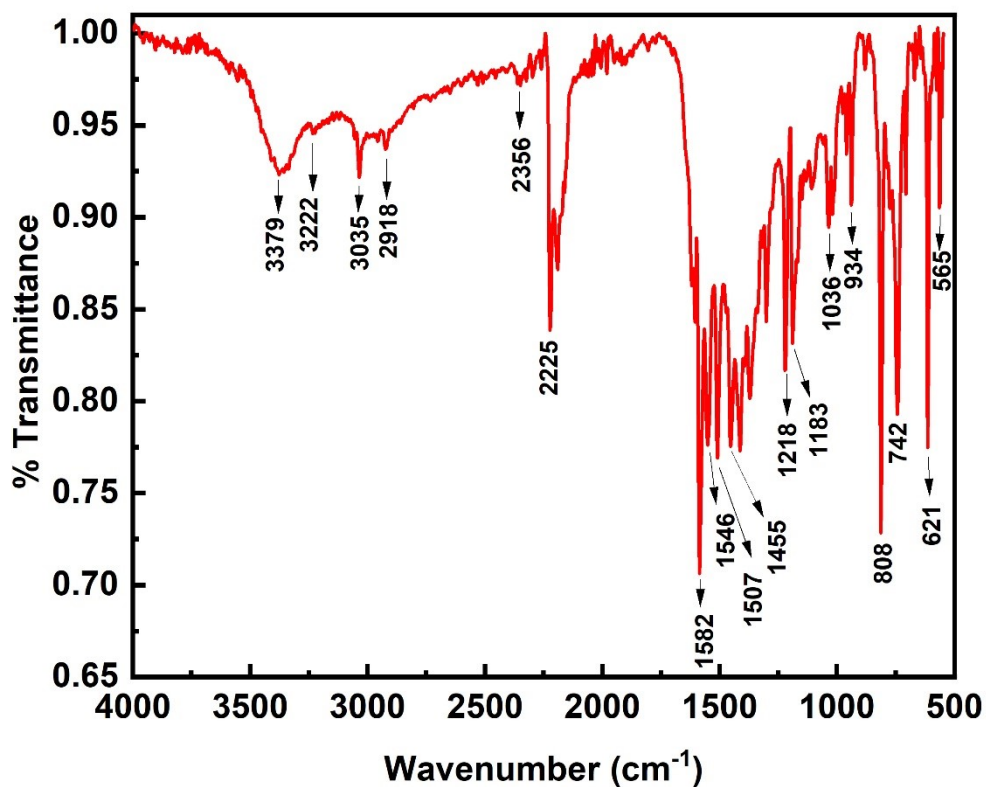

Fig.S5g FT-IR Spectra of compound I7.

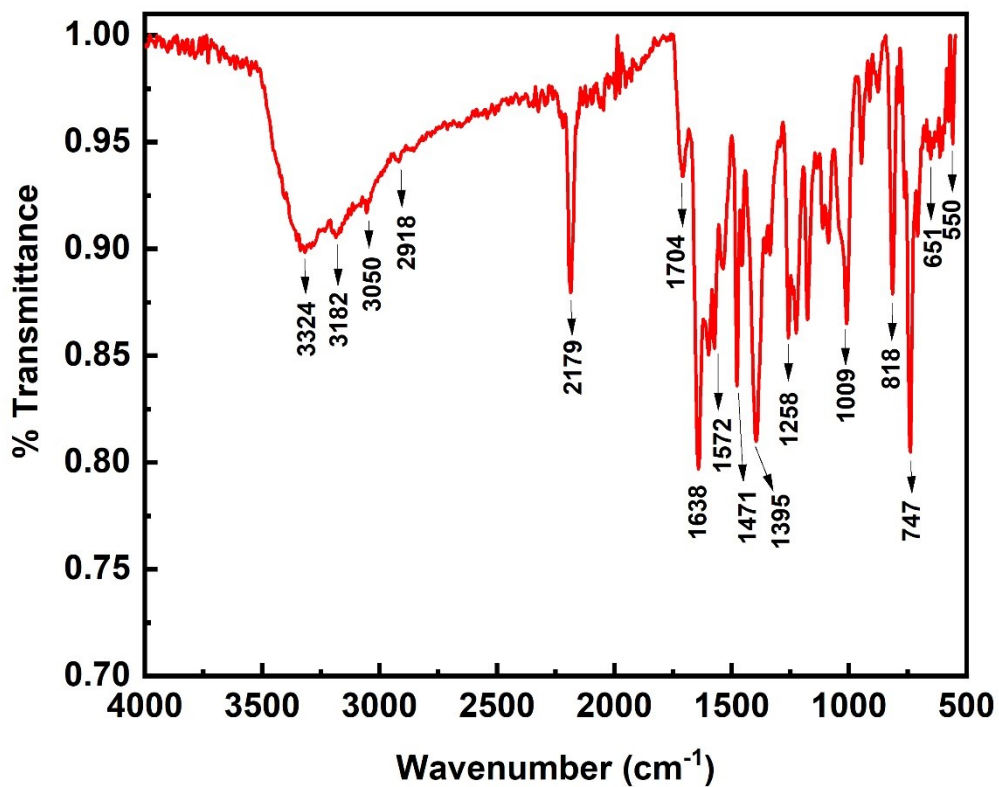

Fig.S5h FT-IR Spectra of compound I8.

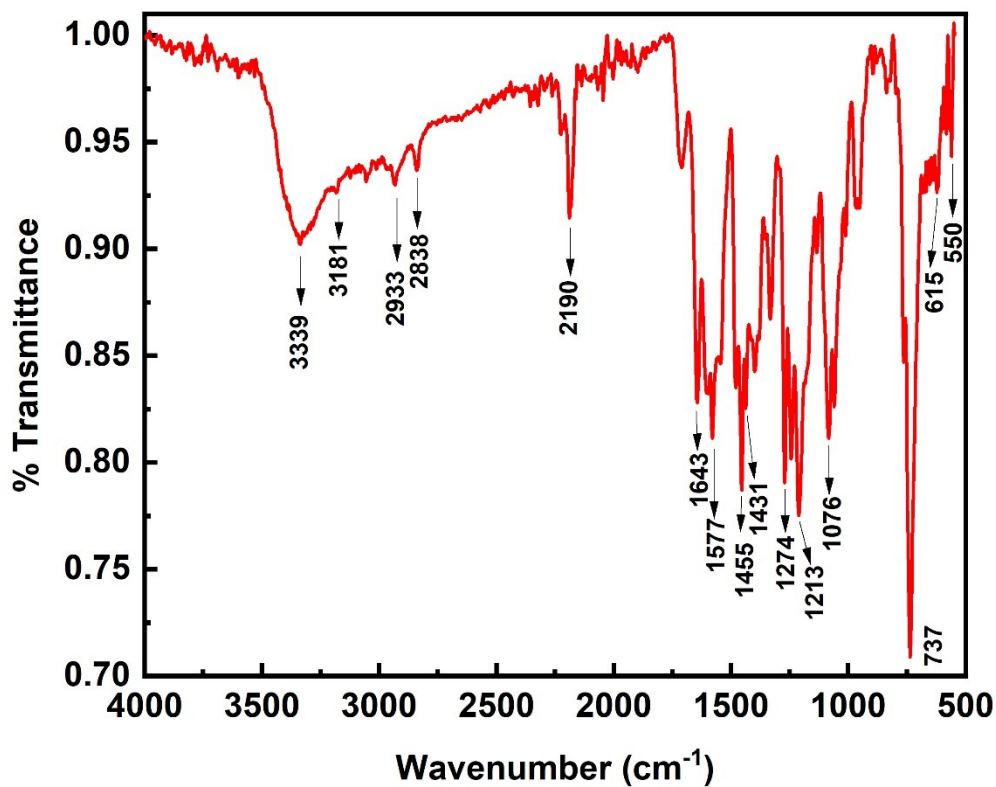

Fig.S5i FT-IR Spectra of compound I9.

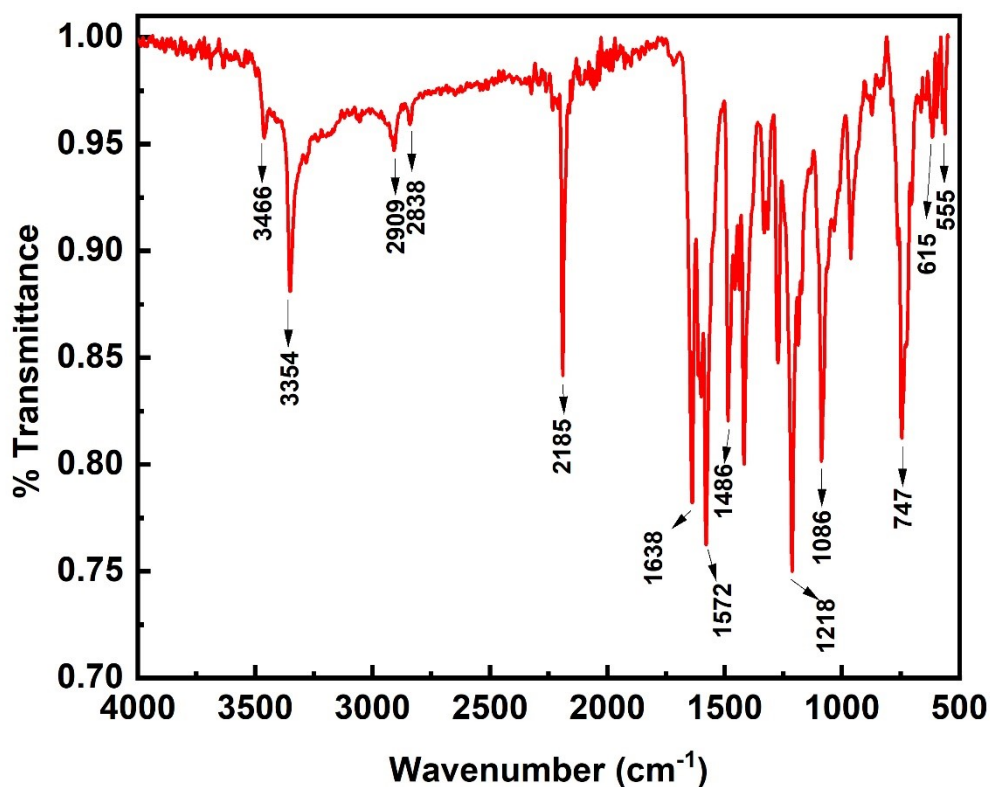

Fig. S5j FT-IR Spectra of compound I10.

Spectral details of the compounds listed in Table 2

Characterization data of the synthesized 2-amino-4-H-chromene derivatives

2-((1H-indol-3-yl)(4-nitrophenyl)methyl)malononitrile (I1):

Pale yellow, <sup>1</sup>H NMR (CDCl<sub>3</sub>) δ(ppm): 5.06 (d, 1H, CH), 4.54 (d, 1H, CH) 8.41 (s, 1H, NH), 7.10-8.28 (m, HAr); <sup>13</sup>C-NMR (CDCl<sub>3</sub>) δ(ppm): 29.07, 43.81, 111.19, 111.56, 111.63, 111.84, 120.75, 122.24, 123.57, 124.39, 125.43, 129.42, 136.42, 143.98, 148.13; FT-IR (cm<sup>-1</sup>): 3419, 3374, 3055, 2888, 2198, 1648, 1602, 1420, 1343, 1221, 1107, 1012, 848, 746, 712, 622, 580.

2-((1H-indol-3-yl)(phenyl)methyl)malononitrile (I2):

White, <sup>1</sup>H NMR (CDCl<sub>3</sub>) δ(ppm): 4.94 (d, 1H, CH), 4.45 (d, 1H, CH) 8.29 (s, 1H, NH), 6.56-8.13 (m, HAr); FT-IR (cm<sup>-1</sup>): 3425, 3334, 3095, 2898, 2190, 1648, 1598, 1572, 1425, 1218, 1096, 1025, 843, 732, 626, 565.

2-((4-chlorophenyl)(1H-indol-3-yl)methyl)malononitrile (I3):

Yellow, <sup>1</sup>H NMR (CDCl<sub>3</sub>) δ(ppm): 4.45 (d, 1H, CH) 4.93 (d, 1H, CH) 8.32 (s, 1H, NH), 6.58-8.19 (m, HAr); <sup>13</sup>C NMR : 29.48, 43.60, 102.66, 111.02, 111.66, 118.58, 119.83, 120.47, 120.74, 122, 122.08, 123.30, 124.12, 129.42, 129.64, 130.10, 131.85, 141.19, 158.29, FT-IR (cm<sup>-1</sup>): 3419, 3378, 3033, 2885, 2225, 1582, 1497, 1417, 1088, 1008, 826, 746, 626, 584.

2-((4-hydroxyphenyl)(1H-indol-3-yl)methyl)malononitrile (I4):

Creamy-white, <sup>1</sup>H NMR (CDCl<sub>3</sub>) δ(ppm): 4.88 (d, 1H, CH), 4.41 (d, 1H, CH) 9.86 (s, 1H, OH), 8.26 (s, 1H, NH), 6.72-7.92 (m, HAr); FT-IR (cm<sup>-1</sup>): 3404, 3121, 2892, 2827, 2221, 1577, 1522, 1491, 1446, 1345, 1213, 1177, 1025, 792, 712, 610, 560.

2-((1H-indol-3-yl)(p-tolyl)methyl)malononitrile (I5):

Cream, <sup>1</sup>H NMR (CDCl<sub>3</sub>) δ(ppm): 4.87 (d, 1H, CH), 4.40 (d, 1H, CH) 8.31 (s, 1H, NH), 3.90 (s, 3H, CH<sub>3</sub>) 6.54-8.20 (HAr); <sup>13</sup>C NMR: 13.82, 32.73, 45.67, 100.93, 111.35, 111.94, 117.73, 118.04, 118.72, 118.83, 119.96, 120.01, 120.83, 121.24, 123.53, 125.16, 131.04, 133.19, 135.82, 136.84; FT-IR (cm<sup>-1</sup>): 3298, 3065, 2853, 220, 1643, 1593, 1567, 1511, 1021, 838, 742, 666, 606, 560.

2-((5-nitro-1H-indol-3-yl)(4-nitrophenyl)methyl)malononitrile (I6):

Brown, <sup>1</sup>H NMR (CDCl<sub>3</sub>) δ(ppm): 4.13 (1H, CH), 5.25 (d, 1H, CH), 8.62 (s, 1H, NH), 6.75-8.55 (HAr); <sup>13</sup>C NMR: 30.21, 42.22, 87.59, 105.18, 110.99, 111.60, 112.63, 117.78, 118.04, 124.67, 127.27, 131.32, 135.80, 150.39, 156.84; FT-IR (cm<sup>-1</sup>): 3308, 3111, 3040, 2934, 2853, 2230, 1602, 1577, 1516, 1416, 1319, 1213, 1010, 748, 681, 610, 580.

2-((2-methyl-1H-indol-3-yl)(4-nitrophenyl)methyl)malononitrile (I7):

Straw colour, <sup>1</sup>H NMR (DMSO-d<sub>6</sub>) δ(ppm): 5.10 (1H, CH), 5.73 (d, 1H, CH), 2.37 (s, 3H, CH<sub>3</sub>) 10.74 (s, 1H, NH), 6.90-8.45 (HAr); FT-IR (cm<sup>-1</sup>): 3379, 3222, 3035, 3035, 2918, 2356, 2225, 1582, 1546, 1507, 1455, 1218, 1183, 1036, 934, 808, 742, 621, 565.

2-((2-hydroxy-3-methoxyphenyl)(1H-indol-3-yl)methyl)malononitrile (I8):

Orange, <sup>1</sup>H NMR (CDCl<sub>3</sub>) δ(ppm): 4.65 (d, 1H, CH), 5.03 (d, 1H, CH), 11.14 (s, 1H, OH) 8.18 (s, 1H, NH), 6.89-8.06 (HAr); FT-IR (cm<sup>-1</sup>): 3324, 3182, 3050, 2918, 2179, 1704, 1638, 1572, 1471, 1395, 1258, 1009, 818, 747, 651, 550.

2-((5-chloro-2-hydroxy-4-nitrophenyl)(1H-indol-3-yl)methyl)malononitrile (I9):

Yellow, <sup>1</sup>HNMR (CDCl<sub>3</sub>) δ(ppm): 4.67 (d, 1H, CH), 4.98 (d, 1H, CH), 9.44 (s, 1H, OH) 8.19 (s, 1H, NH), 6.95-7.77 (HAr); FT-IR (cm<sup>-1</sup>): 3339, 3181, 2933, 2838, 2190, 1643, 1577, 1455, 1431, 1274, 1213, 1076, 737, 615, 550.

2-(((3,5-dibromo-2-hydroxyphenyl)(1H-indol-3-yl)methyl)malononitrile (I10):

Yellow, <sup>1</sup>HNMR (DMSO-d<sub>6</sub>) δ(ppm): 4.31 (d, 1H, CH), 5.04 (d, 1H, CH), 10.99 (s, 1H, OH) 9.94 (s, 1H, NH), 6.72-8.23 (HAr); FT-IR (cm<sup>-1</sup>): 3466, 3354, 2909, 2838, 2185, 1638, 1572, 1486, 1218, 1086, 747, 615, 555.

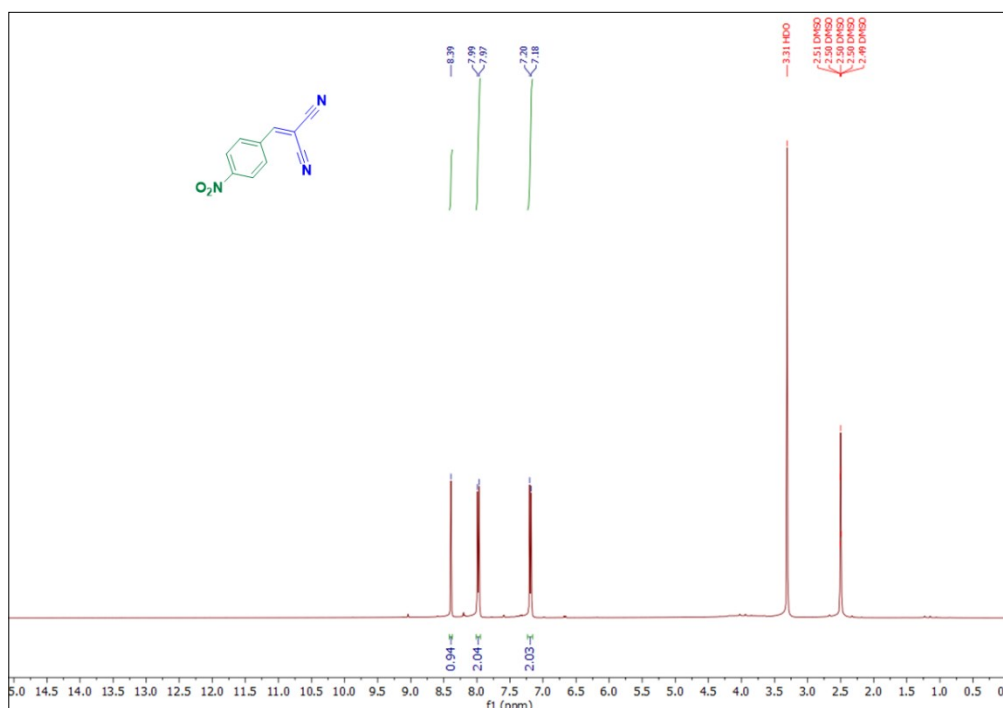

**Fig. S6** <sup>1</sup>H-NMR of alkene intermediate (I).



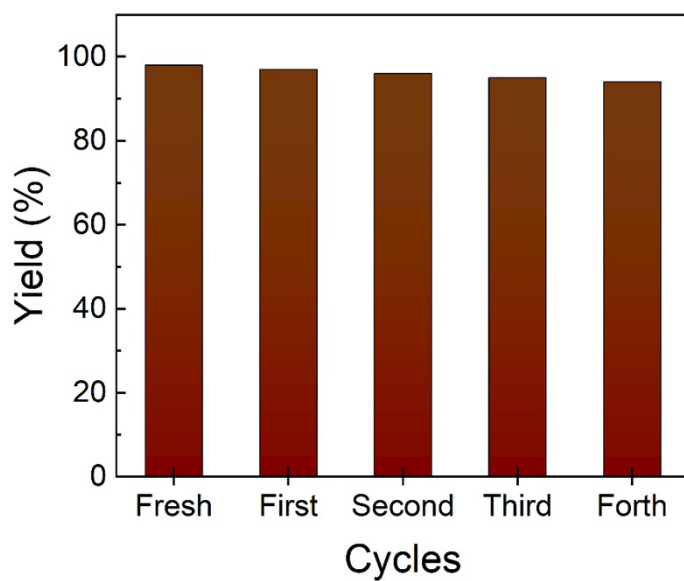

**Fig. S7** Recyclability of CuSB-GO/FO for the catalytic production of 3-substituted indole up to 4 cycles.

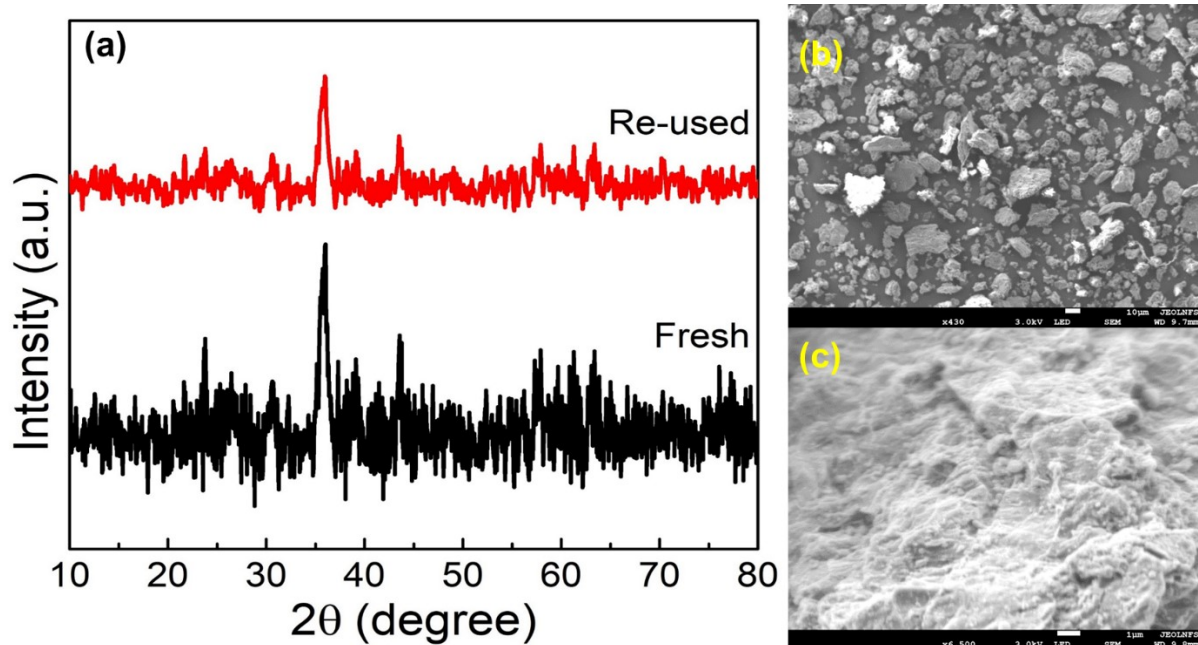

**Fig. S8** Recyclable catalyst (a) XRD; (b-c) SEM.

**Table S1** The bactericidal activity of GO, GO-NH, and CuSB-GO/FO

| Sl. No | Compounds  | <i>Staphylococcus aureus</i><br>Concentration ( $\mu\text{g/mL}$ ) / Zone of Inhibition (mm) |    |    |     | <i>E coli</i><br>Concentration ( $\mu\text{g/mL}$ ) / Zone of Inhibition (mm) |    |    |     |
|--------|------------|----------------------------------------------------------------------------------------------|----|----|-----|-------------------------------------------------------------------------------|----|----|-----|
|        |            | 25                                                                                           | 50 | 75 | 100 | 25                                                                            | 50 | 75 | 100 |
| 1      | Ampicillin | 17                                                                                           | 18 | 19 | 21  | 16                                                                            | 18 | 19 | 21  |
| 2      | GO         | 0                                                                                            | 9  | 9  | 12  | 0                                                                             | 0  | 6  | 7   |
| 3      | GO-NH      | 9                                                                                            | 11 | 13 | 15  | 4                                                                             | 8  | 9  | 11  |
| 4      | CuSB-GO/FO | 2                                                                                            | 11 | 15 | 18  | 0                                                                             | 8  | 10 | 15  |
